# Supplementary material for: Selective removal of cationic micro-pollutants using disulfide-linked network structures
Source: Royal Society of Chemistry journal article supplement (doi:10.1039/c7ra04775d), 2017-01-01
Supplement: c7ra04775d1.pdf [file c7ra04775d1.pdf]

Electronic Supplementary Information (ESI)

## **Selective removal of cationic micro-pollutants using disulfide-linked network structures**

Mehmet Sahin Atas<sup>1</sup>, Sami Dursun<sup>1</sup>, Hasan Akyildiz<sup>1</sup>, Murat Citir<sup>2</sup>, Cafer T. Yavuz<sup>3\*</sup>,  
Mustafa Selman Yavuz<sup>1\*</sup>

<sup>1</sup> *Metallurgy and Materials Engineering Department, Selcuk University, Konya, Turkey*

<sup>2</sup> *Abdullah Gül University, Melikgazi 38039, Kayseri, Turkey.*

<sup>3</sup> *Graduate School of EEWS, Korea Advanced Institute of Science and Technology (KAIST), Daejeon,  
34141 Republic of Korea*

*\* Address correspondence to E-mails: yavuz@kaist.ac.kr, selmanyavuz@gmail.com*

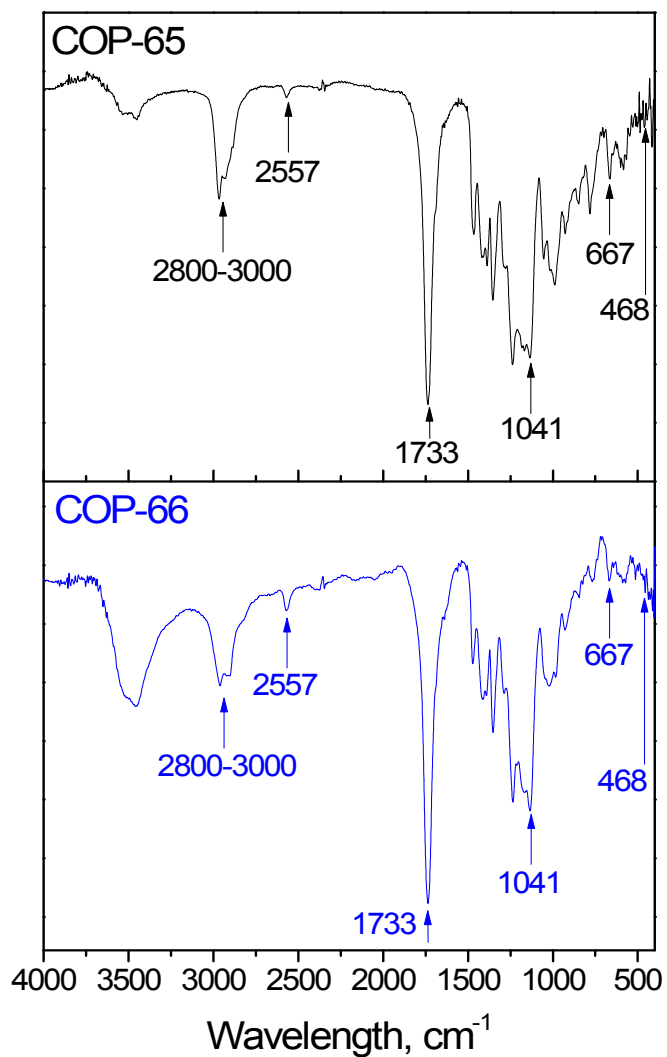

**Figure S1. FT-IR spectra for COP-65 and COP-66.** The characteristic vibration peaks for  $\text{-C=O}$ ,  $\text{-C-O}$ ,  $\text{-C-S}$  and  $\text{-S-S-}$  are visible at 1733, 1041, 667 and 468  $\text{cm}^{-1}$ , respectively. There is also terminal  $\text{-S-H}$  group present in both the networks as indicated with a minor peak at 2557  $\text{cm}^{-1}$ . Intense stretching signals at 2800–3000 correspond to  $\text{-C-H}$  groups.

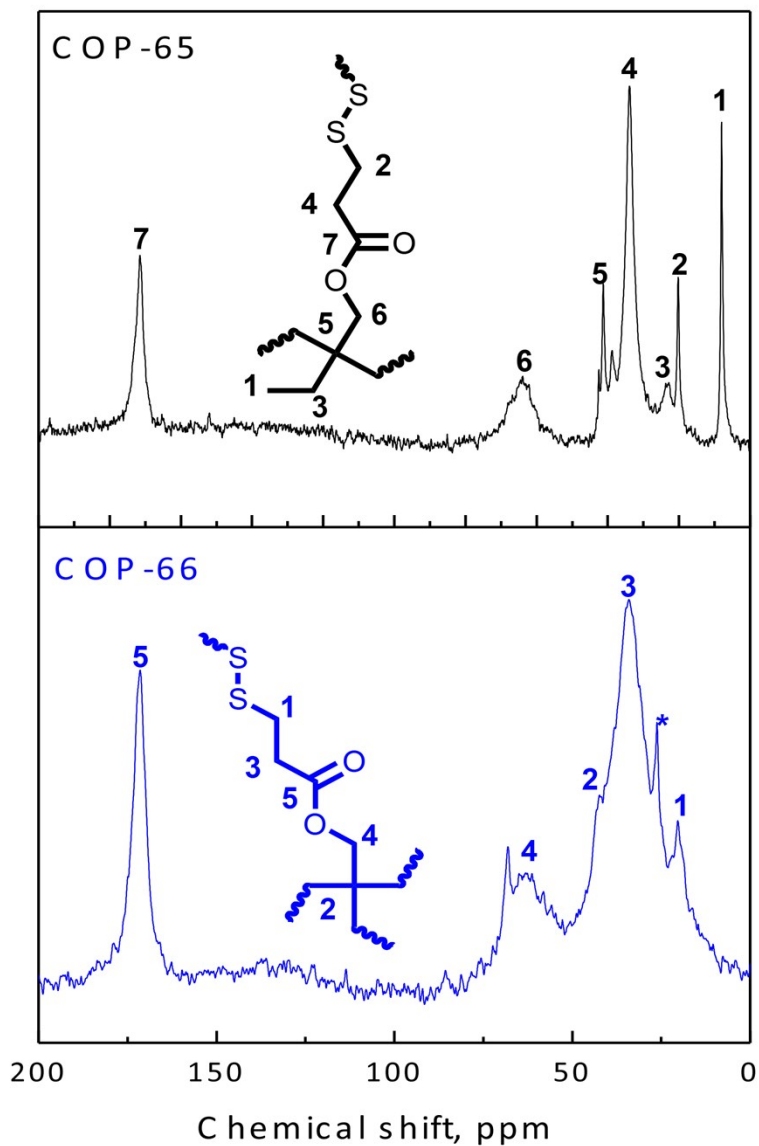

**Figure S2.** CP/MAS  $^{13}\text{C}$ -NMR spectra of COP-65 and COP-66. These confirmed the formation of disulfide polymeric networks as evidenced by characteristic chemical shifts at 171.5, 64.2, 41.6, 34.1, 23.5 and 7.6 for COP-65, and 171.5, 63.4, 42.5, 34.4 and 20.3 for COP-66.

**Table S1.** Pharmaceuticals and Endocrine Disrupting Compounds (EDCs) in drinking water (\*pesticide \*\*steroid hormone \*\*\*plastic and plasticizer) (The data from treating Contaminants of Emerging Concern. EPA August 2010 & Pharmaceuticals in Drinking-water. WHO 2011)

| <b>Pharmaceuticals</b> | <b>EDCs</b>               | <b>Other chemicals</b>     |
|------------------------|---------------------------|----------------------------|
| Atenolol               | Atrazine*                 | Metolachlor*               |
| Atorvastatin           | 17B-estradiol*            | DEET*                      |
| Caffeine               | Linuron*                  | BHT                        |
| Carbamazepine          | Estrone**                 | TCEP***                    |
| Diazepam               | 17-a-ethynylestradiol**   | TCPP***                    |
| Diclofenac             | Progesterone**            | Tri(chloroethyl) phosphate |
| Fluoxetine             | Testosterone**            |                            |
| Gemfibrozil            | Bisphenol A***            |                            |
| Ibuprofen              | Butylbenzyl phthalate***  |                            |
| Iopromide              | Diethylhexyl phthalate*** |                            |
| Naproxen               | Galaxolide                |                            |
| Phenytoin              | Nonylphenol               |                            |
| Sulfamehoxazole        |                           |                            |
| Triclosan              |                           |                            |
| Trimethoprim           |                           |                            |
